# Supplementary material for: Genomic analyses of Burkholderia respiratory isolates indicates two evolutionarily distinct B. anthina clades
Source: Front Microbiol. 2023 Nov 21;14:1274280. doi: 10.3389/fmicb.2023.1274280 (PMC10702961; doi:10.3389/fmicb.2023.1274280)
Supplement: Supplementary file 4 [file Table_4.XLSX]

## Sheet: KEGG enrichment
Annotation	Enriched In Group	P value	Description
K07645	Clade_I	8.35829e-09	qseC; two-component system, OmpR family, sensor histidine kinase QseC [EC:2.7.13.3]
K00217	Clade_I	8.35829e-09	E1.3.1.32; maleylacetate reductase [EC:1.3.1.32]
K00480	Clade_I	8.35829e-09	E1.14.13.1; salicylate hydroxylase [EC:1.14.13.1]
K15982	Clade_I	8.35829e-09	kshA; 3-ketosteroid 9alpha-monooxygenase subunit A [EC:1.14.15.30]
K03718	Clade_I	8.35829e-09	asnC; Lrp/AsnC family transcriptional regulator, regulator for asnA, asnC and gidA
K18366	Clade_I	8.35829e-09	bphJ, xylQ, nahO, tesF; acetaldehyde/propanal dehydrogenase [EC:1.2.1.10 1.2.1.87]
K09964	Clade_I	8.35829e-09	K09964; uncharacterized protein
K17725	Clade_I	8.35829e-09	ETHE1; sulfur dioxygenase [EC:1.13.11.18]
K00955	Clade_I	8.35829e-09	cysNC; bifunctional enzyme CysN/CysC [EC:2.7.7.4 2.7.1.25]
K10216	Clade_I	8.35829e-09	dmpD, xylF; 2-hydroxymuconate-semialdehyde hydrolase [EC:3.7.1.9]
K19548	Clade_I	8.35829e-09	bacC; dihydroanticapsin dehydrogenase [EC:1.1.1.385]
K16051	Clade_I	8.35829e-09	tesI; 3-oxo-5alpha-steroid 4-dehydrogenase [EC:1.3.99.5]
K03652	Clade_I	8.35829e-09	MPG; DNA-3-methyladenine glycosylase [EC:3.2.2.21]
K09688	Clade_I	8.35829e-09	ABC-2.CPSE.P; capsular polysaccharide transport system permease protein
K00101	Clade_I	8.35829e-09	lldD; L-lactate dehydrogenase (cytochrome) [EC:1.1.2.3]
K18700	Clade_I	8.35829e-09	flK; fluoroacetyl-CoA thioesterase [EC:3.1.2.29]
K12448	Clade_I	8.35829e-09	UXE, uxe; UDP-arabinose 4-epimerase [EC:5.1.3.5]
K05898	Clade_I	8.35829e-09	kstD; 3-oxosteroid 1-dehydrogenase [EC:1.3.99.4]
K01617	Clade_I	8.35829e-09	dmpH, xylI, nahK; 2-oxo-3-hexenedioate decarboxylase [EC:4.1.1.77]
K15919	Clade_I	8.35829e-09	HPR2_3; glyoxylate/hydroxypyruvate reductase [EC:1.1.1.79 1.1.1.81]
K16301	Clade_I	8.35829e-09	efeB; deferrochelatase/peroxidase EfeB [EC:1.11.1.-]
K18364	Clade_I	8.35829e-09	bphH, xylJ, tesE; 2-oxopent-4-enoate/cis-2-oxohex-4-enoate hydratase [EC:4.2.1.80 4.2.1.132]
K00446	Clade_I	8.35829e-09	dmpB, xylE; catechol 2,3-dioxygenase [EC:1.13.11.2]
K18365	Clade_I	8.35829e-09	bphI, xylK, nahM, tesG; 4-hydroxy-2-oxovalerate/4-hydroxy-2-oxohexanoate aldolase [EC:4.1.3.39 4.1.3.43]
K08173	Clade_I	8.35829e-09	ydfJ; MFS transporter, MHS family, metabolite:H+ symporter
K16234	Clade_I	8.35829e-09	hutT; histidine transporter
K01040	Clade_I	8.35829e-09	gctB; glutaconate CoA-transferase, subunit B [EC:2.8.3.12]
K11474	Clade_I	8.35829e-09	glcC; GntR family transcriptional regulator, glc operon transcriptional activator
K12442	Clade_I	8.35829e-09	ppsC; phthiocerol/phenolphthiocerol synthesis type-I polyketide synthase C
K01039	Clade_I	8.35829e-09	gctA; glutaconate CoA-transferase, subunit A [EC:2.8.3.12]
K11264	Clade_I	8.35829e-09	scpB, mmcD; methylmalonyl-CoA decarboxylase [EC:7.2.4.3]
K19713	Clade_I	8.35829e-09	tsdA; thiosulfate dehydrogenase [EC:1.8.2.2]
K16049	Clade_I	8.35829e-09	hsaC; 3,4-dihydroxy-9,10-secoandrosta-1,3,5(10)-triene-9,17-dione 4,5-dioxygenase [EC:1.13.11.25]
K02617	Clade_I	8.35829e-09	paaY; phenylacetic acid degradation protein
K15983	Clade_I	8.35829e-09	kshB; 3-ketosteroid 9alpha-monooxygenase subunit B [EC:1.14.15.30]
K11163	Clade_I	8.35829e-09	DHRS1; dehydrogenase/reductase SDR family member 1 [EC:1.1.-.-]
K18687	Clade_I	8.35829e-09	fadD3; HIP---CoA ligase [EC:6.2.1.41]
K07686	Clade_I	8.35829e-09	uhpA; two-component system, NarL family, uhpT operon response regulator UhpA
K16050	Clade_I	8.35829e-09	hsaD; 4,5:9,10-diseco-3-hydroxy-5,9,17-trioxoandrosta-1(10),2-diene-4-oate hydrolase [EC:3.7.1.17]
K07447	Clade_I	8.35829e-09	ruvX; putative holliday junction resolvase [EC:3.1.-.-]
K19542	Clade_I	8.35829e-09	otrB, tcr; MFS transporter, DHA2 family, tetracycline/oxytetracycline resistance protein
K16243	Clade_I	9.79566e-08	dmpL, poxC; Phenol hydroxylase P1 protein
K02106	Clade_I	9.79566e-08	atoE; short-chain fatty acids transporter
K19200	Clade_I	9.79566e-08	IAL; isopenicillin-N N-acyltransferase like protein
K18029	Clade_I	9.79566e-08	nicA; nicotinate dehydrogenase subunit A [EC:1.17.2.1]
K07266	Clade_I	9.79566e-08	kpsC, lipA; capsular polysaccharide export protein
K03759	Clade_I	9.79566e-08	adiC; arginine:agmatine antiporter
K16244	Clade_I	9.79566e-08	dmpM, poxB; phenol hydroxylase P2 protein
K08322	Clade_I	9.79566e-08	rspB; L-gulonate 5-dehydrogenase [EC:1.1.1.380]
K05832	Clade_I	9.79566e-08	ABC.X4.P; putative ABC transport system permease protein
K05833	Clade_I	9.79566e-08	ABC.X4.A; putative ABC transport system ATP-binding protein
K13529	Clade_I	9.79566e-08	ada-alkA; AraC family transcriptional regulator, regulatory protein of adaptative response / DNA-3-methyladenine glycosylase II [EC:3.2.2.21]
K10107	Clade_I	9.79566e-08	ABC-2.CPSE.P1; capsular polysaccharide transport system permease protein
K16245	Clade_I	9.79566e-08	dmpO, poxE; phenol hydroxylase P4 protein
K00040	Clade_I	9.79566e-08	uxuB; fructuronate reductase [EC:1.1.1.57]
K03396	Clade_I	9.79566e-08	gfa; S-(hydroxymethyl)glutathione synthase [EC:4.4.1.22]
K01800	Clade_I	9.79566e-08	maiA, GSTZ1; maleylacetoacetate isomerase [EC:5.2.1.2]
K16246	Clade_I	9.79566e-08	dmpP, poxF; phenol hydroxylase P5 protein
K11249	Clade_I	9.79566e-08	eamB; cysteine/O-acetylserine efflux protein
K01989	Clade_I	9.79566e-08	ABC.X4.S; putative ABC transport system substrate-binding protein
K00588	Clade_I	9.79566e-08	E2.1.1.104; caffeoyl-CoA O-methyltransferase [EC:2.1.1.104]
K10217	Clade_I	9.79566e-08	dmpC, xylG, praB; aminomuconate-semialdehyde/2-hydroxymuconate-6-semialdehyde dehydrogenase [EC:1.2.1.32 1.2.1.85]
K15790	Clade_I	9.79566e-08	nifQ; nitrogen fixation protein NifQ
K00450	Clade_I	9.79566e-08	E1.13.11.4; gentisate 1,2-dioxygenase [EC:1.13.11.4]
K16242	Clade_I	9.79566e-08	dmpN, poxD; phenol hydroxylase P3 protein [EC:1.14.13.-]
K08323	Clade_I	9.79566e-08	rspA, manD; mannonate dehydratase [EC:4.2.1.8]
K14974	Clade_I	9.79566e-08	nicC; 6-hydroxynicotinate 3-monooxygenase [EC:1.14.13.114]
K16249	Clade_I	9.79566e-08	dmpK, poxA; phenol hydroxylase P0 protein
K18028	Clade_I	1.04911e-07	nicX; 2,5-dihydroxypyridine 5,6-dioxygenase [EC:1.13.11.9]
K12960	Clade_I	1.04911e-07	mtaD; 5-methylthioadenosine/S-adenosylhomocysteine deaminase [EC:3.5.4.31 3.5.4.28]
K16047	Clade_I	1.04911e-07	hsaA; 3-hydroxy-9,10-secoandrosta-1,3,5(10)-triene-9,17-dione monooxygenase [EC:1.14.14.12]
K18982	Clade_I	1.04911e-07	gli; D-galactarolactone isomerase [EC:5.4.1.4]
K01799	Clade_I	1.04911e-07	nicE, maiA; maleate isomerase [EC:5.2.1.1]
K19745	Clade_I	1.04911e-07	acuI; acrylyl-CoA reductase (NADPH) [EC:1.3.1.-]
K13995	Clade_I	1.04911e-07	nicF; maleamate amidohydrolase [EC:3.5.1.107]
K15357	Clade_I	1.04911e-07	nicD; N-formylmaleamate deformylase [EC:3.5.1.106]
K01958	Clade_I	7.93268e-07	PC, pyc; pyruvate carboxylase [EC:6.4.1.1]
K02554	Clade_I	7.93268e-07	mhpD; 2-keto-4-pentenoate hydratase [EC:4.2.1.80]
K04748	Clade_I	7.93268e-07	norQ; nitric oxide reductase NorQ protein
K02851	Clade_I	7.93268e-07	wecA, tagO, rfe; UDP-GlcNAc:undecaprenyl-phosphate/decaprenyl-phosphate GlcNAc-1-phosphate transferase [EC:2.7.8.33 2.7.8.35]
K08092	Clade_I	7.93268e-07	dlgD; 3-dehydro-L-gulonate 2-dehydrogenase [EC:1.1.1.130]
K18289	Clade_I	7.93268e-07	ict-P; itaconate CoA-transferase [EC:2.8.3.- 2.8.3.22]
K18030	Clade_I	7.93268e-07	nicB; nicotinate dehydrogenase subunit B [EC:1.17.2.1]
K18702	Clade_I	7.93268e-07	uctC; CoA:oxalate CoA-transferase [EC:2.8.3.19]
K12252	Clade_I	7.93268e-07	aruH; arginine:pyruvate transaminase [EC:2.6.1.84]
K02081	Clade_I	7.93268e-07	agaR; DeoR family transcriptional regulator, aga operon transcriptional repressor
K15768	Clade_I	7.93268e-07	tsaM; p-toluenesulfonate methyl-monooxygenase oxygenase component TsaM [EC:1.14.13.-]
K05795	Clade_I	9.23277e-07	terD; tellurium resistance protein TerD
K09799	Clade_I	9.23277e-07	K09799; uncharacterized protein
K20444	Clade_I	9.23277e-07	rfbC; O-antigen biosynthesis protein [EC:2.4.1.-]
K09691	Clade_I	9.23277e-07	ABC-2.LPSE.A; lipopolysaccharide transport system ATP-binding protein
K06940	Clade_I	9.23277e-07	K06940; uncharacterized protein
K07088	Clade_I	1.31809e-06	K07088; uncharacterized protein
K07265	Clade_I	1.31809e-06	kpsS, lipB; capsular polysaccharide export protein
K10118	Clade_I	4.96928e-06	msmF; raffinose/stachyose/melibiose transport system permease protein
K18954	Clade_I	4.96928e-06	pobR; AraC family transcriptional regulator, transcriptional activator of pobA
K01666	Clade_I	4.96928e-06	mhpE; 4-hydroxy 2-oxovalerate aldolase [EC:4.1.3.39]
K14274	Clade_I	4.96928e-06	xylC; xylonolactonase [EC:3.1.1.-]
K10834	Clade_I	4.96928e-06	E3.6.3.41; heme-transporting ATPase [EC:3.6.3.41]
K10119	Clade_I	4.96928e-06	msmG; raffinose/stachyose/melibiose transport system permease protein
K09883	Clade_I	4.96928e-06	cobT; cobaltochelatase CobT [EC:6.6.1.2]
K03929	Clade_I	4.96928e-06	pnbA; para-nitrobenzyl esterase [EC:3.1.1.-]
K10117	Clade_I	4.96928e-06	msmE; raffinose/stachyose/melibiose transport system substrate-binding protein
K04073	Clade_I	4.96928e-06	mhpF; acetaldehyde dehydrogenase [EC:1.2.1.10]
K20454	Clade_I	4.96928e-06	dml; 2,3-dimethylmalate lyase [EC:4.1.3.32]
K15735	Clade_I	5.82752e-06	csiR; GntR family transcriptional regulator, carbon starvation induced regulator
K00661	Clade_I	9.76109e-06	maa; maltose O-acetyltransferase [EC:2.3.1.79]
K01993	Clade_I	1.05968e-05	ABC-2.TX; HlyD family secretion protein
K09709	Clade_I	1.05968e-05	meh; 3-methylfumaryl-CoA hydratase [EC:4.2.1.153]
K12141	Clade_I	2.58505e-05	hyfF; hydrogenase-4 component F [EC:1.-.-.-]
K08685	Clade_I	2.58505e-05	qhpA; quinohemoprotein amine dehydrogenase [EC:1.4.9.1]
K10713	Clade_I	2.58505e-05	fae; 5,6,7,8-tetrahydromethanopterin hydro-lyase [EC:4.2.1.147]
K06871	Clade_I	2.58505e-05	K06871; uncharacterized protein
K12137	Clade_I	2.58505e-05	hyfB; hydrogenase-4 component B [EC:1.-.-.-]
K10854	Clade_I	2.58505e-05	acxB; acetone carboxylase, alpha subunit [EC:6.4.1.6]
K12140	Clade_I	2.58505e-05	hyfE; hydrogenase-4 component E [EC:1.-.-.-]
K10856	Clade_I	2.58505e-05	acxC; acetone carboxylase, gamma subunit [EC:6.4.1.6]
K02584	Clade_I	2.58505e-05	nifA; Nif-specific regulatory protein
K05889	Clade_I	2.58505e-05	pvadh; polyvinyl alcohol dehydrogenase (cytochrome) [EC:1.1.2.6]
K10855	Clade_I	2.58505e-05	acxA; acetone carboxylase, beta subunit [EC:6.4.1.6]
K09882	Clade_I	5.4532e-05	cobS; cobaltochelatase CobS [EC:6.6.1.2]
K11531	Clade_I	6.20008e-05	lsrR; lsr operon transcriptional repressor
K12138	Clade_I	0.000117785	hyfC; hydrogenase-4 component C [EC:1.-.-.-]
K00103	Clade_I	0.000117785	GULO; L-gulonolactone oxidase [EC:1.1.3.8]
K07248	Clade_I	0.000117785	aldA; lactaldehyde dehydrogenase / glycolaldehyde dehydrogenase [EC:1.2.1.22 1.2.1.21]
K10674	Clade_I	0.000117785	ectD; ectoine hydroxylase [EC:1.14.11.55]
K10676	Clade_I	0.000117785	tfdB; 2,4-dichlorophenol 6-monooxygenase [EC:1.14.13.20]
K18023	Clade_I	0.000117785	mbhJ; membrane-bound hydrogenase subunit mbhJ [EC:1.12.7.2]
K13028	Clade_I	0.000210627	oxdA; aldoxime dehydratase [EC:4.99.1.5]
K07592	Clade_I	0.000210627	tdcA; LysR family transcriptional regulator, tdc operon transcriptional activator
K01721	Clade_I	0.000210627	nthA; nitrile hydratase subunit alpha [EC:4.2.1.84]
K16652	Clade_I	0.000210627	dprE2; decaprenylphospho-beta-D-erythro-pentofuranosid-2-ulose 2-reductase [EC:1.1.1.333]
K18852	Clade_I	0.000210627	HPA3; D-amino-acid N-acetyltransferase [EC:2.3.1.36]
K08083	Clade_I	0.000210627	algR; two-component system, LytTR family, response regulator AlgR
K13928	Clade_I	0.000210627	mdcR; LysR family transcriptional regulator, malonate utilization transcriptional regulator
K09703	Clade_I	0.000210627	K09703; uncharacterized protein
K20807	Clade_I	0.000210627	nthB; nitrile hydratase subunit beta [EC:4.2.1.84]
K03518	Clade_I	0.000229303	coxS; aerobic carbon-monoxide dehydrogenase small subunit [EC:1.2.5.3]
K03520	Clade_I	0.000229303	coxL, cutL; aerobic carbon-monoxide dehydrogenase large subunit [EC:1.2.5.3]
K18369	Clade_I	0.000346116	adh2; alcohol dehydrogenase [EC:1.1.1.-]
K11688	Clade_I	0.00046353	dctP; C4-dicarboxylate-binding protein DctP
K16568	Clade_I	0.000639744	exoZ; exopolysaccharide production protein ExoZ
K21023	Clade_I	0.000639744	mucR; diguanylate cyclase [EC:2.7.7.65]
K00015	Clade_I	0.000639744	gyaR, GOR1; glyoxylate reductase [EC:1.1.1.26]
K08688	Clade_I	0.000639744	E3.5.3.3; creatinase [EC:3.5.3.3]
K09019	Clade_I	0.000639744	rutE; 3-hydroxypropanoate dehydrogenase [EC:1.1.1.-]
K13786	Clade_I	0.000639744	cobR; cob(II)yrinic acid a,c-diamide reductase [EC:1.16.8.1]
K06872	Clade_I	0.000639744	K06872; uncharacterized protein
K03744	Clade_I	0.000639744	lemA; LemA protein
K10218	Clade_I	0.0008977	ligK, galC; 4-hydroxy-4-methyl-2-oxoglutarate aldolase [EC:4.1.3.17]
K11740	Clade_I	0.0008977	nfrB; bacteriophage N4 adsorption protein B
K07071	Clade_I	0.00155205	K07071; uncharacterized protein
K06446	Clade_I	0.00181513	DCAA; acyl-CoA dehydrogenase [EC:1.3.99.-]
K15975	Clade_I	0.00181513	K15975; glyoxalase family protein
K07536	Clade_I	0.00181513	badI; 2-ketocyclohexanecarboxyl-CoA hydrolase [EC:3.1.2.-]
K05601	Clade_I	0.00181513	hcp; hydroxylamine reductase [EC:1.7.99.1]
K16161	Clade_I	0.00181513	mmoC; methane monooxygenase component C [EC:1.14.13.25]
K16516	Clade_I	0.00181513	galR; LysR family transcriptional regulator, regulator for genes of the gallate degradation pathway
K00122	Clade_I	0.00468841	FDH; formate dehydrogenase [EC:1.17.1.9]
K03310	Clade_I	0.00486628	TC.AGCS; alanine or glycine:cation symporter, AGCS family
K01771	Clade_I	0.00486628	plc; 1-phosphatidylinositol phosphodiesterase [EC:4.6.1.13]
K01535	Clade_I	0.00486628	PMA1, PMA2; H+-transporting ATPase [EC:7.1.2.1]
K10220	Clade_I	0.00486628	ligJ; 4-oxalmesaconate hydratase [EC:4.2.1.83]
K07234	Clade_I	0.00486628	K07234; uncharacterized protein involved in response to NO
K05714	Clade_I	0.00486628	mhpC; 2-hydroxy-6-oxonona-2,4-dienedioate hydrolase [EC:3.7.1.14]
K07169	Clade_I	0.00486628	K07169; FHA domain-containing protein
K06887	Clade_I	0.00486628	K06887; uncharacterized protein
K08177	Clade_I	0.00486628	oxlT; MFS transporter, OFA family, oxalate/formate antiporter
K03205	Clade_I	0.00486628	virD4, lvhD4; type IV secretion system protein VirD4
K15019	Clade_I	0.00486628	K15019; 3-hydroxypropionyl-coenzyme A dehydratase [EC:4.2.1.116]
K18567	Clade_I	0.00486628	pbuE; MFS transporter, DHA1 family, purine base/nucleoside efflux pump
K07576	Clade_I	0.00538675	K07576; metallo-beta-lactamase family protein
K20530	Clade_I	0.0120118	trbE; type IV secretion system protein TrbE
K16303	Clade_I	0.0120118	cmtAc; p-cumate 2,3-dioxygenase subunit beta [EC:1.14.12.25]
K10907	Clade_I	0.0120118	K10907; aminotransferase [EC:2.6.1.-]
K05995	Clade_I	0.0120118	pepE; dipeptidase E [EC:3.4.13.21]
K04116	Clade_I	0.0120118	aliA; cyclohexanecarboxylate-CoA ligase [EC:6.2.1.-]
K06034	Clade_I	0.0120118	comD; sulfopyruvate decarboxylase subunit alpha [EC:4.1.1.79]
K09701	Clade_I	0.0120118	K09701; uncharacterized protein
K08082	Clade_I	0.0120118	algZ; two-component system, LytTR family, sensor histidine kinase AlgZ [EC:2.7.13.3]
K06954	Clade_I	0.0120118	K06954; uncharacterized protein
K04117	Clade_I	0.0120118	aliB; cyclohexanecarboxyl-CoA dehydrogenase [EC:1.3.99.-]
K20531	Clade_I	0.0120118	trbF; type IV secretion system protein TrbF
K01474	Clade_I	0.0120118	hyuB; N-methylhydantoinase B [EC:3.5.2.14]
K03292	Clade_I	0.0120118	TC.GPH; glycoside/pentoside/hexuronide:cation symporter, GPH family
K04099	Clade_I	0.0120118	desB, galA; gallate dioxygenase [EC:1.13.11.57]
K03098	Clade_I	0.0120118	APOD; apolipoprotein D and lipocalin family protein
K07658	Clade_I	0.0120118	phoB1, phoP; two-component system, OmpR family, alkaline phosphatase synthesis response regulator PhoP
K07214	Clade_I	0.0120118	fes; enterochelin esterase and related enzymes
K01473	Clade_I	0.0120118	hyuA; N-methylhydantoinase A [EC:3.5.2.14]
K01455	Clade_I	0.0120118	E3.5.1.49; formamidase [EC:3.5.1.49]
K18983	Clade_I	0.0131281	gci; D-galactarolactone cycloisomerase [EC:5.5.1.27]
K05708	Clade_I	0.0282367	hcaE, hcaA1; 3-phenylpropionate/trans-cinnamate dioxygenase subunit alpha [EC:1.14.12.19]
K20533	Clade_I	0.0282367	trbI; type IV secretion system protein TrbI
K05709	Clade_I	0.0282367	hcaF, hcaA2; 3-phenylpropionate/trans-cinnamate dioxygenase subunit beta [EC:1.14.12.19]
K09252	Clade_I	0.0282367	FAEB; feruloyl esterase [EC:3.1.1.73]
K20529	Clade_I	0.0282367	trbD; type IV secretion system protein TrbD
K15829	Clade_I	0.0282367	hycD; formate hydrogenlyase subunit 4
K16874	Clade_I	0.0282367	hmfF; 2,5-furandicarboxylate decarboxylase 1
K20532	Clade_I	0.0282367	trbG; type IV secretion system protein TrbG
K10236	Clade_I	0.0282367	thuE; trehalose/maltose transport system substrate-binding protein
K04759	Clade_I	0.0282367	feoB; ferrous iron transport protein B
K18613	Clade_I	0.0282367	K18613; 3-hydroxy-2-methylpyridine-4,5-dicarboxylate 4-decarboxylase [EC:4.1.1.51]
K09689	Clade_I	0.0282367	ABC-2.CPSE.A; capsular polysaccharide transport system ATP-binding protein [EC:3.6.3.38]
K05713	Clade_I	0.0282367	mhpB; 2,3-dihydroxyphenylpropionate 1,2-dioxygenase [EC:1.13.11.16]
K15830	Clade_I	0.0282367	hycE; formate hydrogenlyase subunit 5
K15737	Clade_I	0.0282367	csiD; protein CsiD
K09024	Clade_I	0.0282367	rutF; flavin reductase [EC:1.5.1.-]
K05358	Clade_I	0.0282367	quiA; quinate dehydrogenase (quinone) [EC:1.1.5.8]
K10237	Clade_I	0.0282367	thuF, sugA; trehalose/maltose transport system permease protein
K10238	Clade_I	0.0282367	thuG, sugB; trehalose/maltose transport system permease protein
K05711	Clade_I	0.0282367	hcaB; 2,3-dihydroxy-2,3-dihydrophenylpropionate dehydrogenase [EC:1.3.1.87]
K07343	Clade_I	0.0282367	tfoX; DNA transformation protein and related proteins
K06076	Clade_I	0.0282367	fadL; long-chain fatty acid transport protein
K15067	Clade_I	0.0282367	amnD; 2-aminomuconate deaminase [EC:3.5.99.5]
K07642	Clade_I	0.0282367	baeS, smeS; two-component system, OmpR family, sensor histidine kinase BaeS [EC:2.7.13.3]
K20266	Clade_I	0.0282367	trbJ; type IV secretion system protein TrbJ
K20023	Clade_I	0.0307215	talrD-galrD; L-talarate/galactarate dehydratase [EC:4.2.1.156 4.2.1.42]
K13694	Clade_I	0.0366224	mepS, spr; murein DD-endopeptidase / murein LD-carboxypeptidase [EC:3.4.-.- 3.4.17.13]
K00830	Clade_I	0.0366224	AGXT; alanine-glyoxylate transaminase / serine-glyoxylate transaminase / serine-pyruvate transaminase [EC:2.6.1.44 2.6.1.45 2.6.1.51]
K02005	Clade_I	0.0441625	ABC.CD.TX; HlyD family secretion protein
K12503	Clade_II	8.35829e-09	E2.5.1.68; short-chain Z-isoprenyl diphosphate synthase [EC:2.5.1.68]
K01851	Clade_II	8.35829e-09	pchA; salicylate biosynthesis isochorismate synthase [EC:5.4.4.2]
K12239	Clade_II	8.35829e-09	pchE; dihydroaeruginoic acid synthetase
K18301	Clade_II	8.35829e-09	mexL; TetR/AcrR family transcriptional regulator, mexJK operon transcriptional repressor
K19062	Clade_II	8.35829e-09	arr; rifampin ADP-ribosylating transferase
K20273	Clade_II	8.35829e-09	zmpA; zinc metalloprotease ZmpA
K01674	Clade_II	8.35829e-09	cah; carbonic anhydrase [EC:4.2.1.1]
K10917	Clade_II	8.35829e-09	aphA; PadR family transcriptional regulator, regulatory protein AphA
K01071	Clade_II	8.35829e-09	MCH; medium-chain acyl-[acyl-carrier-protein] hydrolase [EC:3.1.2.21]
K03309	Clade_II	8.35829e-09	TC.DAACS; dicarboxylate/amino acid:cation (Na+ or H+) symporter, DAACS family
K00041	Clade_II	8.35829e-09	uxaB; tagaturonate reductase [EC:1.1.1.58]
K11712	Clade_II	8.35829e-09	dctR; two-component system, LuxR family, response regulator DctR
K18939	Clade_II	8.35829e-09	lmrA, yxaF; TetR/AcrR family transcriptional regulator, lmrAB and yxaGH operons repressor
K12243	Clade_II	8.35829e-09	pchR; AraC family transcriptional regulator, transcriptional activator of the genes for pyochelin and ferripyochelin receptors
K00758	Clade_II	8.35829e-09	deoA, TYMP; thymidine phosphorylase [EC:2.4.2.4]
K11178	Clade_II	8.35829e-09	yagS; xanthine dehydrogenase YagS FAD-binding subunit [EC:1.17.1.4]
K04708	Clade_II	8.35829e-09	E1.1.1.102; 3-dehydrosphinganine reductase [EC:1.1.1.102]
K14987	Clade_II	8.35829e-09	fixJ; two-component system, LuxR family, response regulator FixJ
K05875	Clade_II	8.35829e-09	tar; methyl-accepting chemotaxis protein II, aspartate sensor receptor
K06609	Clade_II	8.35829e-09	iolT; MFS transporter, SP family, major inositol transporter
K10679	Clade_II	8.35829e-09	nfnB, nfsB; nitroreductase / dihydropteridine reductase [EC:1.-.-.- 1.5.1.34]
K05994	Clade_II	8.35829e-09	E3.4.11.10; bacterial leucyl aminopeptidase [EC:3.4.11.10]
K02805	Clade_II	8.35829e-09	wecE, rffA; dTDP-4-amino-4,6-dideoxygalactose transaminase [EC:2.6.1.59]
K19982	Clade_II	8.35829e-09	prnD; aminopyrrolnitrin oxygenase [EC:1.14.13.-]
K14257	Clade_II	8.35829e-09	ctcP, cts4, prnC; tetracycline 7-halogenase / FADH2 O2-dependent halogenase [EC:1.14.19.49 1.14.19.-]
K20275	Clade_II	8.35829e-09	aidA; nematocidal protein AidA
K12373	Clade_II	8.35829e-09	HEXA_B; hexosaminidase [EC:3.2.1.52]
K19981	Clade_II	8.35829e-09	prnB; monodechloroaminopyrrolnitrin synthase
K01489	Clade_II	8.35829e-09	cdd, CDA; cytidine deaminase [EC:3.5.4.5]
K00087	Clade_II	8.35829e-09	ygeS, xdhA; xanthine dehydrogenase molybdenum-binding subunit [EC:1.17.1.4]
K13483	Clade_II	8.35829e-09	yagT; xanthine dehydrogenase YagT iron-sulfur-binding subunit
K01569	Clade_II	8.35829e-09	oxdD; oxalate decarboxylase [EC:4.1.1.2]
K11150	Clade_II	8.35829e-09	RDH8; retinol dehydrogenase 8 [EC:1.1.1.-]
K14266	Clade_II	8.35829e-09	prnA, rebH, ktzQ; tryptophan 7-halogenase [EC:1.14.19.9]
K12962	Clade_II	8.35829e-09	arnE; undecaprenyl phosphate-alpha-L-ara4N flippase subunit ArnE
K14578	Clade_II	8.35829e-09	nahAb, nagAb, ndoA, nbzAb, dntAb; naphthalene 1,2-dioxygenase ferredoxin component
K18842	Clade_II	8.35829e-09	chpS, chpBI; antitoxin ChpS
K19267	Clade_II	8.35829e-09	qorB; NAD(P)H dehydrogenase (quinone) [EC:1.6.5.2]
K05351	Clade_II	8.35829e-09	E1.1.1.9; D-xylulose reductase [EC:1.1.1.9]
K03828	Clade_II	8.35829e-09	yjgM; putative acetyltransferase [EC:2.3.1.-]
K18242	Clade_II	8.35829e-09	nagG; salicylate 5-hydroxylase large subunit [EC:1.14.13.172]
K04782	Clade_II	8.35829e-09	pchB; isochorismate pyruvate lyase [EC:4.2.99.21]
K03453	Clade_II	8.35829e-09	TC.BASS; bile acid:Na+ symporter, BASS family
K02526	Clade_II	8.35829e-09	kdgT; 2-keto-3-deoxygluconate permease
K20274	Clade_II	8.35829e-09	zmpB; zinc metalloprotease ZmpB
K01697	Clade_II	8.35829e-09	CBS; cystathionine beta-synthase [EC:4.2.1.22]
K12241	Clade_II	8.35829e-09	pchG; pyochelin biosynthetic protein PchG
K18304	Clade_II	8.35829e-09	lasR; LuxR family transcriptional regulator, quorum-sensing system regulator LasR
K11177	Clade_II	8.35829e-09	yagR; xanthine dehydrogenase YagR molybdenum-binding subunit [EC:1.17.1.4]
K18243	Clade_II	8.35829e-09	nagH; salicylate 5-hydroxylase small subunit [EC:1.14.13.172]
K10018	Clade_II	9.79566e-08	occT, nocT; octopine/nopaline transport system substrate-binding protein
K10021	Clade_II	9.79566e-08	occP, nocP; octopine/nopaline transport system ATP-binding protein [EC:3.6.3.-]
K07217	Clade_II	9.79566e-08	K07217; Mn-containing catalase
K10020	Clade_II	9.79566e-08	occQ, nocQ; octopine/nopaline transport system permease protein
K03332	Clade_II	9.79566e-08	fruA; fructan beta-fructosidase [EC:3.2.1.80]
K00692	Clade_II	9.79566e-08	sacB; levansucrase [EC:2.4.1.10]
K08189	Clade_II	9.79566e-08	SLC16A13; MFS transporter, MCP family, solute carrier family 16 (monocarboxylic acid transporters), member 13
K05685	Clade_II	9.79566e-08	macB; macrolide transport system ATP-binding/permease protein [EC:3.6.3.-]
K03893	Clade_II	9.79566e-08	arsB; arsenical pump membrane protein
K03317	Clade_II	9.79566e-08	TC.CNT; concentrative nucleoside transporter, CNT family
K08279	Clade_II	9.79566e-08	caiE; carnitine operon protein CaiE
K10019	Clade_II	9.79566e-08	occM, nocM; octopine/nopaline transport system permease protein
K13888	Clade_II	9.79566e-08	macA; membrane fusion protein, macrolide-specific efflux system
K18841	Clade_II	9.79566e-08	chpB, chpBK; mRNA interferase ChpB [EC:3.1.-.-]
K07074	Clade_II	1.04911e-07	K07074; uncharacterized protein
K03392	Clade_II	1.04911e-07	ACMSD; aminocarboxymuconate-semialdehyde decarboxylase [EC:4.1.1.45]
K00045	Clade_II	1.04911e-07	E1.1.1.67, mtlK; mannitol 2-dehydrogenase [EC:1.1.1.67]
K07064	Clade_II	1.04911e-07	K07064; uncharacterized protein
K16407	Clade_II	1.04911e-07	stiC; stigmatellin polyketide synthase StiC
K02669	Clade_II	7.93268e-07	pilT; twitching motility protein PilT
K03168	Clade_II	7.93268e-07	topA; DNA topoisomerase I [EC:5.99.1.2]
K00612	Clade_II	7.93268e-07	E2.1.3.-; carbamoyltransferase [EC:2.1.3.-]
K00076	Clade_II	7.93268e-07	hdhA; 7-alpha-hydroxysteroid dehydrogenase [EC:1.1.1.159]
K19189	Clade_II	7.93268e-07	dhpH; 2,6-dihydroxypyridine 3-monooxygenase [EC:1.14.13.10]
K01805	Clade_II	7.93268e-07	xylA; xylose isomerase [EC:5.3.1.5]
K11004	Clade_II	7.93268e-07	hlyB, cyaB; ATP-binding cassette, subfamily B, bacterial HlyB/CyaB
K18910	Clade_II	9.23277e-07	dpe, lre; D-psicose/D-tagatose/L-ribulose 3-epimerase [EC:5.1.3.30 5.1.3.31]
K03435	Clade_II	9.23277e-07	fruR1, fruR; LacI family transcriptional regulator, fructose operon transcriptional repressor
K03756	Clade_II	9.23277e-07	potE; putrescine:ornithine antiporter
K14446	Clade_II	9.23277e-07	ccr; crotonyl-CoA carboxylase/reductase [EC:1.3.1.85]
K06900	Clade_II	9.23277e-07	K06900; uncharacterized protein
K01183	Clade_II	1.31809e-06	E3.2.1.14; chitinase [EC:3.2.1.14]
K11003	Clade_II	4.96928e-06	hlyD, cyaD; hemolysin D
K15408	Clade_II	4.96928e-06	coxAC; cytochrome c oxidase subunit I+III [EC:1.9.3.1]
K06182	Clade_II	4.96928e-06	rluF; 23S rRNA pseudouridine2604 synthase [EC:5.4.99.21]
K06893	Clade_II	4.96928e-06	K06893; uncharacterized protein
K03291	Clade_II	4.96928e-06	MFS.SET; MFS transporter, SET family, sugar efflux transporter
K01628	Clade_II	4.96928e-06	fucA; L-fuculose-phosphate aldolase [EC:4.1.2.17]
K01224	Clade_II	4.96928e-06	E3.2.1.89; arabinogalactan endo-1,4-beta-galactosidase [EC:3.2.1.89]
K02414	Clade_II	4.96928e-06	fliK; flagellar hook-length control protein FliK
K05373	Clade_II	5.82752e-06	ybtX, irp8; MFS transporter, putative signal transducer
K14256	Clade_II	5.82752e-06	oxyS, cts8; anhydrotetracycline 6-monooxygenase / 5a,11a-dehydrotetracycline 5-monooxygenase [EC:1.14.13.38 1.14.13.234]
K15973	Clade_II	5.82752e-06	mhqR; MarR family transcriptional regulator, 2-MHQ and catechol-resistance regulon repressor
K04095	Clade_II	5.82752e-06	fic; cell filamentation protein
K01581	Clade_II	5.82752e-06	E4.1.1.17, ODC1, speC, speF; ornithine decarboxylase [EC:4.1.1.17]
K08167	Clade_II	9.76109e-06	smvA, qacA, lfrA; MFS transporter, DHA2 family, multidrug resistance protein
K03827	Clade_II	9.76109e-06	yjaB; putative acetyltransferase [EC:2.3.1.-]
K15727	Clade_II	2.58505e-05	czcB; membrane fusion protein, cobalt-zinc-cadmium efflux system
K10543	Clade_II	2.58505e-05	xylF; D-xylose transport system substrate-binding protein
K10544	Clade_II	2.58505e-05	xylH; D-xylose transport system permease protein
K04054	Clade_II	2.58505e-05	yscK, sctK; type III secretion protein K
K15726	Clade_II	2.58505e-05	czcA; cobalt-zinc-cadmium resistance protein CzcA
K06145	Clade_II	2.58505e-05	gntR; LacI family transcriptional regulator, gluconate utilization system Gnt-I transcriptional repressor
K07238	Clade_II	2.58505e-05	TC.ZIP, zupT, ZRT3, ZIP2; zinc transporter, ZIP family
K10545	Clade_II	2.58505e-05	xylG; D-xylose transport system ATP-binding protein [EC:3.6.3.17]
K12583	Clade_II	2.58505e-05	mgtA; phosphatidylinositol alpha 1,6-mannosyltransferase [EC:2.4.1.-]
K05841	Clade_II	2.58505e-05	E2.4.1.173; sterol 3beta-glucosyltransferase [EC:2.4.1.173]
K12238	Clade_II	2.95401e-05	pchD; pyochelin biosynthesis protein PchD
K20938	Clade_II	5.4532e-05	ladA; long-chain alkane monooxygenase [EC:1.14.14.28]
K18144	Clade_II	0.000117785	adeR; two-component system, OmpR family, response regulator AdeR
K18146	Clade_II	0.000117785	adeB; multidrug efflux pump
K06044	Clade_II	0.000117785	treY, glgY; (1->4)-alpha-D-glucan 1-alpha-D-glucosylmutase [EC:5.4.99.15]
K16088	Clade_II	0.000117785	TC.FEV.OM1, fhuE, fpvA, fptA; outer-membrane receptor for ferric coprogen and ferric-rhodotorulic acid
K07787	Clade_II	0.000117785	cusA, silA; Cu(I)/Ag(I) efflux system membrane protein CusA/SilA
K12242	Clade_II	0.000117785	pchC; pyochelin biosynthetic protein PchC
K18143	Clade_II	0.000117785	adeS; two-component system, OmpR family, sensor histidine kinase AdeS [EC:2.7.13.3]
K01214	Clade_II	0.000117785	ISA, treX; isoamylase [EC:3.2.1.68]
K18145	Clade_II	0.000117785	adeA; membrane fusion protein, multidrug efflux system
K16147	Clade_II	0.000117785	glgE; starch synthase (maltosyl-transferring) [EC:2.4.99.16]
K12340	Clade_II	0.000117785	tolC; outer membrane protein
K05523	Clade_II	0.000117785	hchA; D-lactate dehydratase / protein deglycase [EC:4.2.1.130 3.5.1.124]
K01236	Clade_II	0.000117785	treZ, glgZ; maltooligosyltrehalose trehalohydrolase [EC:3.2.1.141]
K05343	Clade_II	0.000117785	treS; maltose alpha-D-glucosyltransferase / alpha-amylase [EC:5.4.99.16 3.2.1.1]
K07798	Clade_II	0.000117785	cusB, silB; membrane fusion protein, Cu(I)/Ag(I) efflux system
K17838	Clade_II	0.000117785	oxa; beta-lactamase class D [EC:3.5.2.6]
K00471	Clade_II	0.000210627	E1.14.11.1; gamma-butyrobetaine dioxygenase [EC:1.14.11.1]
K03223	Clade_II	0.000210627	yscL, sctL; type III secretion protein L
K11931	Clade_II	0.000210627	pgaB; poly-beta-1,6-N-acetyl-D-glucosamine N-deacetylase [EC:3.5.1.-]
K11690	Clade_II	0.000210627	dctM; C4-dicarboxylate transporter, DctM subunit
K18374	Clade_II	0.000210627	hrpB2; type III secretion inner rod protein HrpB2
K15125	Clade_II	0.000210627	fhaB; filamentous hemagglutinin
K01115	Clade_II	0.000210627	PLD1_2; phospholipase D1/2 [EC:3.1.4.4]
K18373	Clade_II	0.000210627	hrpB1; type III secretion protein HrpB1
K03331	Clade_II	0.000210627	DCXR; L-xylulose reductase [EC:1.1.1.10]
K11936	Clade_II	0.000210627	pgaC, icaA; poly-beta-1,6-N-acetyl-D-glucosamine synthase [EC:2.4.1.-]
K06889	Clade_II	0.000210627	K06889; uncharacterized protein
K03220	Clade_II	0.000210627	yscD, sctD, ssaD; type III secretion protein D
K09984	Clade_II	0.000210627	K09984; uncharacterized protein
K12240	Clade_II	0.000229303	pchF; pyochelin synthetase
K09023	Clade_II	0.000346116	rutD; aminoacrylate hydrolase [EC:3.5.1.-]
K03224	Clade_II	0.000639744	yscN, sctN, hrcN, ssaN; ATP synthase in type III secretion protein N [EC:7.1.2.2]
K03219	Clade_II	0.000639744	yscC, sctC, ssaC; type III secretion protein C
K03230	Clade_II	0.000639744	yscV, sctV, hrcV, ssaV, invA; type III secretion protein V
K07326	Clade_II	0.000639744	fhaC; hemolysin activation/secretion protein
K03225	Clade_II	0.000639744	yscQ, sctQ, hrcQ, ssaQ, spaO; type III secretion protein Q
K03229	Clade_II	0.000639744	yscU, sctU, hrcU, ssaU; type III secretion protein U
K03554	Clade_II	0.000639744	rdgC; recombination associated protein RdgC
K00008	Clade_II	0.000639744	SORD, gutB; L-iditol 2-dehydrogenase [EC:1.1.1.14]
K15725	Clade_II	0.000639744	czcC; outer membrane protein, cobalt-zinc-cadmium efflux system
K03227	Clade_II	0.000639744	yscS, sctS, hrcS, ssaS; type III secretion protein S
K03228	Clade_II	0.000639744	yscT, sctT, hrcT, ssaT; type III secretion protein T
K03226	Clade_II	0.000639744	yscR, sctR, hrcR, ssaR; type III secretion protein R
K03222	Clade_II	0.000639744	yscJ, sctJ, hrcJ, ssaJ; type III secretion protein J
K00705	Clade_II	0.0008977	malQ; 4-alpha-glucanotransferase [EC:2.4.1.25]
K07494	Clade_II	0.00155205	K07494; putative transposase
K02839	Clade_II	0.00160876	prfH; peptide chain release factor
K07782	Clade_II	0.00160876	sdiA; LuxR family transcriptional regulator, quorum-sensing system regulator SdiA
K13010	Clade_II	0.00160876	per, rfbE; perosamine synthetase [EC:2.6.1.102]
K18240	Clade_II	0.00160876	xanB2; chorismate lyase / 3-hydroxybenzoate synthase [EC:4.1.3.40 4.1.3.45]
K00208	Clade_II	0.00181513	fabI; enoyl-[acyl-carrier protein] reductase I [EC:1.3.1.9 1.3.1.10]
K15783	Clade_II	0.00181513	doeA; ectoine hydrolase [EC:3.5.4.44]
K15786	Clade_II	0.00181513	doeC; aspartate-semialdehyde dehydrogenase [EC:1.2.1.-]
K18893	Clade_II	0.00181513	vcaM; ATP-binding cassette, subfamily B, multidrug efflux pump
K04047	Clade_II	0.00181513	dps; starvation-inducible DNA-binding protein
K15785	Clade_II	0.00181513	doeD; L-2,4-diaminobutyrate transaminase [EC:2.6.1.76]
K07045	Clade_II	0.00181513	K07045; uncharacterized protein
K08282	Clade_II	0.00181513	E2.7.11.1; non-specific serine/threonine protein kinase [EC:2.7.11.1]
K12984	Clade_II	0.00181513	waaE, kdtX; (heptosyl)LPS beta-1,4-glucosyltransferase [EC:2.4.1.-]
K14052	Clade_II	0.00468841	puuP; putrescine importer
K18148	Clade_II	0.00486628	rtcB; release factor H-coupled RctB family protein
K15784	Clade_II	0.00486628	doeB; N2-acetyl-L-2,4-diaminobutanoate deacetylase [EC:3.5.1.125]
K01281	Clade_II	0.00486628	pepX; X-Pro dipeptidyl-peptidase [EC:3.4.14.11]
K00064	Clade_II	0.00486628	E1.1.1.122; D-threo-aldose 1-dehydrogenase [EC:1.1.1.122]
K09946	Clade_II	0.00486628	K09946; uncharacterized protein
K01130	Clade_II	0.00486628	E3.1.6.1, aslA; arylsulfatase [EC:3.1.6.1]
K06606	Clade_II	0.00486628	iolI; 2-keto-myo-inositol isomerase [EC:5.3.99.11]
K01971	Clade_II	0.00538675	ligD; bifunctional non-homologous end joining protein LigD [EC:6.5.1.1]
K09803	Clade_II	0.00538675	K09803; uncharacterized protein
K09961	Clade_II	0.00554128	K09961; uncharacterized protein
K17680	Clade_II	0.00554128	PEO1; twinkle protein [EC:3.6.4.12]
K11898	Clade_II	0.00957192	impE; type VI secretion system protein ImpE
K17865	Clade_II	0.0120118	croR; 3-hydroxybutyryl-CoA dehydratase [EC:4.2.1.55]
K01751	Clade_II	0.0120118	E4.3.1.15; diaminopropionate ammonia-lyase [EC:4.3.1.15]
K03194	Clade_II	0.0120118	virB1; type IV secretion system protein VirB1
K01187	Clade_II	0.0120118	malZ; alpha-glucosidase [EC:3.2.1.20]
K07023	Clade_II	0.0120118	K07023; putative hydrolases of HD superfamily
K07172	Clade_II	0.0120118	mazE, chpAI; antitoxin MazE
K09020	Clade_II	0.0165362	rutB; ureidoacrylate peracid hydrolase [EC:3.5.1.110]
K00619	Clade_II	0.0165362	argA; amino-acid N-acetyltransferase [EC:2.3.1.1]
K03436	Clade_II	0.0165362	fruR2, fruR; DeoR family transcriptional regulator, fructose operon transcriptional repressor
K18302	Clade_II	0.0180244	mexJ; membrane fusion protein, multidrug efflux system
K07301	Clade_II	0.0282367	yrbG; cation:H+ antiporter
K13444	Clade_II	0.0282367	SUMF1, FGE; formylglycine-generating enzyme [EC:1.8.3.7]
K00287	Clade_II	0.0282367	DHFR, folA; dihydrofolate reductase [EC:1.5.1.3]
K02377	Clade_II	0.0366224	TSTA3, fcl; GDP-L-fucose synthase [EC:1.1.1.271]
K01175	Clade_II	0.0366224	ybfF; esterase [EC:3.1.-.-]
K07451	Clade_II	0.0441625	mcrA; 5-methylcytosine-specific restriction enzyme A [EC:3.1.21.-]
K00005	Clade_II	0.0494489	gldA; glycerol dehydrogenase [EC:1.1.1.6]

## Sheet: KEGG enrichment pathways
KEGG Pathway	KO	Function	Clade I Count	Clade II Count
Carbohydrate Metabolism	ko00020	Citrate cycle TCA cycle	1	0
	ko00040	Pentose and glucuronate interconversions	5	6
	ko00051	Fructose and mannose metabolism	0	7
	ko00052	Galactose metabolism	0	1
	ko00053	Ascorbate and aldarate metabolism	5	1
	ko00500	Starch and sucrose metabolism	0	8
	ko00520	Amino sugar and nucleotide sugar metabolism	1	4
	ko00562	Inositol phosphate metabolism	1	1
	ko00620	Pyruvate metabolism	5	1
	ko00630	Glyoxylate and dicarboxylate metabolism	6	3
	ko00640	Propanoate metabolism	2	1
	ko00650	Butanoate metabolism	6	1
	ko00660	C5-Branched dibasic acid metabolism	2	0
Lipid Metabolism	ko00061	Fatty acid biosynthesis	0	2
	ko00121	Secondary bile acid biosynthesis	0	1
	ko00564	Glycerophospholipid metabolism	0	2
	ko00565	Ether lipid metabolism	0	1
	ko00592	alpha-Linolenic acid metabolism	0	1
	ko00600	Sphingolipid metabolism	0	3
Metabolism of cofactors and vitamins	ko00130	Ubiquinone and other terpenoid	0	3
	ko00670	One carbon pool by folate	0	1
	ko00750	Vitamin B6 metabolism	1	0
	ko00760	Nicotinate and nicotinamide metabolism	8	1
	ko00780	Biotin metabolism	0	1
	ko00790	Folate biosynthesis	0	1
	ko00830	Retinol metabolism	0	1
	ko00860	Porphyrin metabolism	3	0
Energy Metabolism	ko00190	Oxidative phosphorylation	1	1
	ko00680	Methane metabolism	7	0
	ko00720	Carbon fixation pathways in prokaryotes	3	0
	ko00910	Nitrogen metabolism	2	1
	ko00920	Sulfur metabolism	2	0
Amino Acid Metabolism	ko00220	Arginine biosynthesis	0	1
	ko00250	Alanine, aspartate and glutamate metabolism	1	0
	ko00260	Glycine, serine and threonine metabolism	4	5
	ko00350	Tyrosine metabolism	2	0
	ko00360	Phenylalanine metabolism	8	0
	ko00270	Cysteine and methionine metabolism	1	1
	ko00310	Lysine degradation	1	1
	ko00330	Arginine and proline metabolism	4	1
	ko00380	Tryptophan metabolism	4	1
	ko00400	Phenylalanine, tyrosine and tryptophan biosynthesis	1	1
Nucleotide Metabolism	ko00230	Purine metabolism	1	5
	ko00240	Pyrimidine metabolism	2	5
Metabolism of terpenoids and polyketides	ko00253	Tetracycline biosynthesis	0	2
Biosynthesis of other secondary metabolites	ko00261	Monobactam biosynthesis	1	0
	ko00311	Penicillin and cephalosporin biosynthesis	1	0
	ko00333	Prodigiosin biosynthesis	0	1
	ko00404	Staurosporine biosynthesis	0	4
	ko00940	Phenylpropanoid biosynthesis	1	0
	ko00941	Flavonoid biosynthesis	1	0
	ko00945	Stilbenoid, diarylheptanoid and gingerol biosynthesis	1	0
	ko00998	Biosynthesis of various antibiotics	1	0
Xenobiotics biodegradation and metabolism	ko00361	Chlorocyclohexane and chlorobenzene degradation	9	0
	ko00362	Benzoate degradation	22	0
	ko00364	Fluorobenzoate degradation	3	0
	ko00365	Furfural degradation	1	0
	ko00621	Dioxin degradation	8	0
	ko00622	Xylene degradation	11	0
	ko00623	Toluene degradation	8	0
	ko00624	Polycyclic aromatic hydrocarbon degradation	1	1
	ko00626	Naphthalene degradation	1	3
	ko00627	Aminobenzoate degradation	3	1
	ko00633	Nitrotoluene degradation	0	2
	ko00642	Ethylbenzene degradation	0	1
	ko00643	Styrene degradation	7	0
	ko00930	Caprolactam degradation	1	0
	ko00983	Drug metabolism - other enzymes	0	2
	ko00984	Steroid degradation	8	0
Metabolism of other amino acids	ko00450	Selenocompound metabolism	1	0
	ko00460	Cyanoamino acid metabolism	1	0
	ko00470	D-Amino acid metabolism	1	0
	ko00480	Glutathione metabolism	0	1
Glycan biosynthesis and metabolism	ko00511	Other glycan degradation	0	1
	ko00513	Various types of N-glycan biosynthesis	0	1
	ko00531	Glycosaminoglycan degradation	0	1
	ko00541	O-Antigen nucleotide sugar biosynthesis	0	3
	ko00542	O-Antigen repeat unit biosynthesis	1	0
	ko00543	Exopolysaccharide biosynthesis	2	1
	ko00552	Teichoic acid biosynthesis	1	0
	ko00572	Arabinogalactan biosynthesis - Mycobacterium	1	0
	ko00604	Glycosphingolipid biosynthesis	0	2
Metabolism of terpenoids and polyketides	ko00900	Terpenoid backbone biosynthesis	0	1
	ko01052	Type I polyketide structures	0	1
	ko01053	Biosynthesis of siderophore group nonribosomal peptides	0	6
	ko01057	Biosynthesis of type II polyketide products	0	2
Global and overview maps	ko01100	Metabolic pathways	104	66
	ko01110	Biosynthesis of secondary metabolites	8	23
	ko01120	Microbial metabolism in diverse environments	74	19
	ko01200	Carbon metabolism	10	2
	ko01210	2-Oxocarboxylic acid metabolism	0	1
	ko01212	Fatty acid metabolism	0	1
	ko01220	Degradation of aromatic compounds	30	1
	ko01230	Biosynthesis of amino acids	1	2
	ko01232	Nucleotide metabolism	0	7
	ko01240	Biosynthesis of cofactors	4	4
	ko01250	Biosynthesis of nucleotide sugars	1	3
Membrane Transport	ko02010	ABC transporters	10	10
Signal Transduction	ko02020	Two-component system	9	9
	ko04014	Ras signaling pathway	0	1
	ko04024	cAMP signaling pathway	0	1
	ko04071	Sphingolipid signaling pathway	0	1
	ko04072	Phospholipase D signaling pathway	0	1
Cell motility	ko02030	Bacterial chemotaxis	0	1
	ko02040	Flagellar assembly	0	1
Membrane Transport	ko03070	Bacterial secretion system	1	14
Replication and repair	ko03410	Base excision repair	2	0
	ko03450	Non-homologous end-joining	0	1
Transport and Catabolism	ko04142	Lysosome	0	2
	ko04144	Endocytosis	0	1
	ko04146	Peroxisome	1	0
Cellular Community - prokaryotes	ko02024	Quorum sensing	8	6
	ko02025	Biofilm formation - Pseudomonas aeruginosa	1	1
	ko02026	Biofilm formation - Escherichia coli	1	3
	ko05111	Biofilm formation - Vibrio cholerae	0	1
Environmental adaptions	ko04626	Plant-pathogen interaction	0	1
Immune System	ko04666	Fc gamma R-mediated phagocytosis	0	1
Nervous System	ko04724	Glutamatergic synapse	0	1
Endocrine System	ko04912	GnRH signaling pathway	0	1
	ko04928	Parathyroid hormone synthesis, secretion and action	0	1
Neurodegenerative disease	ko05017	Spinocerebellar ataxia	0	1
Infection disease bacterial	ko05133	Pertussis	0	5
Cancer Overview	ko05200	Pathways in cancer	0	1
	ko05208	Chemical carcinogenesis - reactive oxygen species	0	1
Cancer Specific	ko05212	Pancreatic cancer	0	1
	ko05219	Bladder cancer	0	1
	ko05231	Choline metabolism in cancer	0	1
Drug resistance: antimicrobial	ko01501	beta Lactam resistance	0	7
	ko01503	Cationic antimicrobial peptide (CAMP) resistance	0	2
`	ko01523	Antifolate resistance	0	1
